## Hepatitis C Virus Genotyping Using Next-Generation Sequencing: An Efficient Alternative to Sanger Sequencing

*To the Editor.*—The global prevalence of hepatitis C virus (HCV) is estimated to be approximately 146 to 219 million people.<sup>1</sup> Of those infected, it has been shown that 4 out of 5 will develop a chronic infection. In addition, 33% of chronically infected patients progress to cirrhosis during a period of 20 to 30 years. The patients with cirrhosis may develop hepatocellular carcinoma at a rate of 2% to 5% per year.<sup>2</sup> HCV has a positive-sense, single-stranded RNA genome, and it has 7 major genotypes with more than 70 subtypes.<sup>3</sup>

Hepatitis C virus genotypes vary in geographical distribution and treatment response varies according to genotype.<sup>4</sup> In clinical diagnostic laboratories, HCV genotyping has traditionally been carried out using polymerase chain reaction or first-generation (Sanger) sequencing-based technologies. Issues with the current mainstream genotyping methods include their limited accuracy in subtyping calls and their inability to detect coinfection, which is estimated to be present in 2% to 7% of patients.<sup>5</sup>

We evaluated the performance characteristics of next-generation sequencing (NGS) in HCV genotyping to increase speed, reduce costs, and generate more accurate coinfection profiles. We accomplished this by generating complementary DNA (cDNA) libraries of plasma samples, which we then sequenced with an Illumina MiSeq (Illumina, San Diego, California). We also developed an in-house bioinformatics workflow, FH-HCV-GT, to analyze and genotype our data and compared the results with

| Sequencing Process           | Hands-on Time, min     |                     |                     |
|------------------------------|------------------------|---------------------|---------------------|
|                              | Sanger, n = 16 Samples | NGS, n = 30 Samples | NGS, n = 96 Samples |
| Sample accessioning          | 24                     | 45                  | 144                 |
| DNA extraction               | 24                     | 45                  | 144                 |
| PCR amplification setup      | 30                     | 52.5                | 110                 |
| Cleanup/washes               | 30                     | 45                  | 30                  |
| QC check                     | 15                     | 30                  | 96                  |
| Preparation for sequence run | 40                     | 67.5                | 90                  |
| Denature                     | 2                      | 3                   | 2                   |
| Program sequencer            | 5                      | 7.5                 | 5                   |
| Analysis                     | 80                     | 60                  | 180                 |
| Review and manual entry      | 10                     | 7.5                 | 25                  |
| <b>Total time</b>            | <b>260</b>             | <b>363</b>          | <b>826</b>          |
| Time/sample                  | 16.25                  | 12.1                | 8.6                 |

Abbreviations: PCR, polymerase chain reaction; Sanger, Sanger sequencing.

commercial software, ABL SA-DeepChek-HCV (Advanced Biological Laboratories, Luxembourg, Luxembourg), available for HCV genotyping.

Sequence data of more than 2 000 000 reads, with a mean length of 200 bases per read, were generated from 15 samples. All samples had 10 000 reads or more. There was 100% concordance of genotypes with the Sanger method when using either ABL SA-DeepChek-HCV or FH-HCV-GT programs for genotyping calls (see Table 1). We were able to detect coinfection of 2 different HCV subtypes with an equal mixture of subtypes 1a and 2b and our NGS technique (see Table 1). Of note, the sequencing data by NGS do not reflect the exact percentage of the intended equal mixture. This is likely due to an amplification bias of the consensus primers used. Further optimization of the polymerase chain reaction conditions is needed to achieve the best efficacy of detecting coinfections.

We found that sample preparation time was 16.25 min/sample using the Sanger method and 12.1 min/sample using the NGS technique. Table 2

shows a comparison of the sample preparation time for each method. Reagent cost per sample was \$32 to process 30 samples at a time using our NGS technique, with a potential cost of \$17 to process 96 samples at a time (see Table 3). In comparison, reagent cost per sample using the Sanger method was \$23, but the throughput was much smaller, with a maximum of 16 samples/run (Table 4). The cost-efficient breakpoint for NGS was 52 samples/run; after that, it becomes more economical (in terms of reagent cost, not even considering the saved technologist time using NGS) to use NGS than Sanger.

Our data indicate that HCV genotyping by NGS technology is as accurate as Sanger sequencing, the current gold standard. Our results indicate that NGS has the potential to be more cost effective with a quicker turnaround and simultaneously offering greater throughput. One of the potential important clinical differences between Sanger and NGS technologies is the ability of NGS to detect coinfections by different strains of HCV.

Table 1. Hepatitis C Virus Genotyping and Software Analysis Validation

| Subtype by Sanger | Sample, No. | Read Range     | Subtyping by NGS; Analyzing With DeepChek <sup>a</sup> | Subtyping by NGS; Analyzing With FH-HCV-GT, <sup>b</sup> Type (%) |
|-------------------|-------------|----------------|--------------------------------------------------------|-------------------------------------------------------------------|
| 1a                | 7           | 16 529–119 112 | 1a                                                     | 1a                                                                |
| 1b                | 2           | 55 135–65 659  | 1b                                                     | 1b                                                                |
| 2a                | 1           | 22 240         | 2a                                                     | 2a                                                                |
| 2b                | 2           | 13 717–45 505  | 2b                                                     | 2b                                                                |
| 3a                | 3           | 20 435–104 031 | 3a                                                     | 3a                                                                |
| 1a and 2b         | 2           | 37 527–46 158  | NA                                                     | 1a (4–6), 2b (94–96)                                              |

Abbreviations: NA, not applicable; NGS, next-generation sequencing.

<sup>a</sup> Illumina MiSeq (Illumina, San Diego, California).

<sup>b</sup> FH-HCV-GT is an in-house bioinformatics workflow process.

## Letter to the Editor

**Table 3. Costs of Next-Generation Sequencing (NGS) Components**

| Illumina Sequencing Components | Quantity, No. Samples | Price, <sup>a</sup> US\$ |
|--------------------------------|-----------------------|--------------------------|
| PhiX Control <sup>b</sup>      | 192                   | 160                      |
| Nextera Index Set <sup>b</sup> | 96                    | 950                      |
| Nano 500 Flowcell <sup>b</sup> | 1 Flowcell            | 639                      |
| Cost/sample <sup>c</sup>       | 30                    | 32                       |
| Cost/sample <sup>c</sup>       | 52                    | 23                       |
| Cost/sample <sup>c</sup>       | 96                    | 17                       |

<sup>a</sup> Prices are list prices from 2016.

<sup>b</sup> Illumina, San Diego, California.

<sup>c</sup> Cost/sample = (160/192) + (950/96) + [639/No. samples(30, 52, or 96)].

**Table 4. Costs of Sanger Sequencing Components**

| Sanger Sequencing Component                                             | Quantity, No. Samples | Price, <sup>a</sup> US\$ |
|-------------------------------------------------------------------------|-----------------------|--------------------------|
| BigDye Terminator v1.1 Cycle Sequencing Reagents-CG <sup>b</sup>        | 100                   | 1314                     |
| BigDye XTerminator Purification Kit <sup>b</sup>                        | 100                   | 245                      |
| POP-6 Polymer for 3130/3130xl Genetic Analyzers <sup>b</sup>            | 200                   | 206                      |
| 3500 Dx Series Sequencing Standard, BigDye Terminator v1.1 <sup>b</sup> | 200                   | 292                      |
| 3130xl/3100 Genetic Analyzer 16-Capillary Array, 36 cm <sup>b</sup>     | 200                   | 1074                     |
| Cost/sample <sup>c</sup>                                                | 16                    | 23                       |

<sup>a</sup> Prices are list prices from 2015.

<sup>b</sup> Thermo Fisher Scientific Life Sciences, Waltham, Massachusetts.

<sup>c</sup> Cost/sample = (1314/100) + (245/100) + (206/200) + (292/200) + (1074/200).

In conclusion, there exists tremendous potential for the application of NGS in the clinical laboratory for cost savings, efficiency, and more-accurate,

clinically relevant genotyping information, particularly for laboratories that are already performing NGS for other diseases.

Cameron Wales, BS<sup>1</sup>; George Corpus, MS<sup>2</sup>; ChungChe Chang, MD, PhD<sup>1,2</sup>

<sup>1</sup> College of Medicine, University of Central Florida, Orlando; <sup>2</sup> Molecular Diagnosis Laboratory, Florida Hospital, Orlando

1. Lavanchy D. The global burden of hepatitis C. *Liver Int.* 2009;29(suppl 1):74–81.

2. Myers RP, Kraiden M, Bilodeau M, et al. Burden of disease and cost of chronic hepatitis C virus infection in Canada. *Can J Gastroenterol Hepatol.* 2014;28(5):243–250.

3. Smith DB, Bukh J, Kuiken C, et al. Expanded classification of hepatitis C virus into 7 genotypes and 67 subtypes: updated criteria and genotype assignment web resource. *Hepatology.* 2014;59(1):318–327.

4. American Association for the Study of Liver Diseases (AASLD); Infectious Disease Society of America (IDSA). HCV guidance: recommendations for testing, managing, and treating hepatitis C. <http://www.hcvguidelines.org/full-report-view>. Accessed on December 12, 2015.

5. Sy T, Jamal MM. Epidemiology of hepatitis C virus (HCV) infection. *Int J Med Sci.* 2006;3(2):41–46.

The authors have no relevant financial interest in the products or companies described in this article.

doi: 10.5858/arpa.2016-0338-LE

## Submissions Now Accepted for the CAP17 Abstract Program

Abstract and case study submissions to the College of American Pathologists (CAP) 2017 Abstract Program are now being accepted. Submissions will be accepted until 5 p.m. Central time Friday, March 10, 2017.

Accepted submissions will appear on the *Archives of Pathology & Laboratory Medicine* Web site as a Web-only supplement to the September 2017 issue. The CAP17 meeting will be held from October 8 to 11 in National Harbor, Maryland.

For a link to the submission site and detailed program information visit the CAP17 Web site ([www.cap.org/cap17](http://www.cap.org/cap17)) and the *Archives* Web site ([www.archivesofpathology.org](http://www.archivesofpathology.org)).
